# Supplementary material for: Global Trends in the Epidemiology and Management of Dyslipidemia
Source: MDPI journal article supplement (doi:10.3390/jcm11216377), 2022-10-28
Supplement: s1 [file s1]

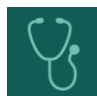

Review

# Global Trends in Epidemiology and Management of Dyslipidemia

Tianxiao Liu, Dong Zhao \* and Yue Qi \*

Center for Clinical and Epidemiological Research, Beijing Anzhen Hospital, Capital Medical University, Beijing Institute of Heart, Lung and Blood Vessel Diseases, The Key Laboratory of Remodeling-Related Cardiovascular Diseases, Ministry of Education, Beijing Municipal Key Laboratory of Clinical Epidemiology, Beijing, China

\* Correspondence: deezhao@vip.sina.com (D.Z.); qiyue\_bjcn@mail.ccmu.edu.cn (Y.Q.)

**Table S1.** Differences of guideline recommendations for management of plasma lipid disorders.

| Super-region/Guidelines                  | Definitions of Extreme Risk | Definitions of Very High Risk                                                                                                                                                            | Definitions of High Risk                                                                                                                                                                                                                                                                    | Treatment Goals of LDL-C                                                                                                                                   |
|------------------------------------------|-----------------------------|------------------------------------------------------------------------------------------------------------------------------------------------------------------------------------------|---------------------------------------------------------------------------------------------------------------------------------------------------------------------------------------------------------------------------------------------------------------------------------------------|------------------------------------------------------------------------------------------------------------------------------------------------------------|
| <b>East and Southeast Asia</b>           |                             |                                                                                                                                                                                          |                                                                                                                                                                                                                                                                                             |                                                                                                                                                            |
| Chinese Society of Cardiology (2016) [1] | NA                          | ASCVD patients                                                                                                                                                                           | <ol style="list-style-type: none"> <li>LDL-C <math>\geq 4.9</math> mmol/L or TC <math>\geq 7.2</math> mmol/L</li> <li>Diabetes patients [LDL-C: 1.8–4.9 mmol/L (or TC: 3.1–7.2 mmol/L) and age <math>\geq 40</math> years]</li> <li>10-year risk of ASCVD <math>\geq 10\%</math></li> </ol> | Very high risk: 70 mg/dL<br>High risk: 100 mg/dL                                                                                                           |
| Philippine Heart Association (2020) [2]  | NA                          | NA                                                                                                                                                                                       | NA                                                                                                                                                                                                                                                                                          | Individuals with clinical ASCVD: 55 mg/dL<br>FH without ASCVD or without major risk factor/target organ damage: 70 mg/dL<br>Individuals with DM: 100 mg/dL |
| Ministry of Health (Malaysia) (2017) [3] | NA                          | <ol style="list-style-type: none"> <li>Established CVD</li> <li>DM with proteinuria or with a major risk factor</li> <li>CKD (Stage 4/5)</li> </ol>                                      | <ol style="list-style-type: none"> <li>CKD (Stage 3)</li> <li>DM without target organ damage</li> <li>Very high levels of individual risk factors</li> <li>10-year risk for CVD <math>&gt; 20\%</math></li> </ol>                                                                           | Very high risk: 70 mg/dL<br>High risk: 100 mg/dL                                                                                                           |
| <b>South Asia</b>                        |                             |                                                                                                                                                                                          |                                                                                                                                                                                                                                                                                             |                                                                                                                                                            |
| Lipid Association of India (2016) [4]    | NA                          | <ol style="list-style-type: none"> <li>Preexisting ASCVD</li> <li>DM with evidence of target organ damage or <math>\geq 2</math> other major ASCVD risk factors</li> <li>HoFH</li> </ol> | 10-year risk for ASCVD death, MI or stroke $> 15\%$                                                                                                                                                                                                                                         | Very high risk: 50 mg/dL<br>High risk: 70 mg/dL                                                                                                            |
| <b>High-income Asia Pacific</b>          |                             |                                                                                                                                                                                          |                                                                                                                                                                                                                                                                                             |                                                                                                                                                            |

|                                                        |    |                                                                                                                                                           |                                                                                                      |                                                                                                                              |
|--------------------------------------------------------|----|-----------------------------------------------------------------------------------------------------------------------------------------------------------|------------------------------------------------------------------------------------------------------|------------------------------------------------------------------------------------------------------------------------------|
| Japan Atherosclerosis Society (2017) [5]               | NA | NA                                                                                                                                                        | 10-year risk of CAD $\geq$ 9%                                                                        | CAD patients who are also suffering from high risk conditions: 70 mg/dL<br>History of CAD: 100 mg/dL<br>High risk: 120 mg/dL |
| Korean Society of Lipid and Atherosclerosis (2018) [6] | NA | ASCVD patients                                                                                                                                            | 1. Carotid artery disease<br>2. Abdominal aneurysm<br>3. DM                                          | Very high risk: 70 mg/dL<br>High risk: 100 mg/dL                                                                             |
| Ministry of Health (Singapore) (2016) [7]              | NA | 1. Established CAD, atherosclerotic cerebrovascular disease, aortic aneurysm or peripheral artery disease<br>2. DM with CKD<br>3. FH                      | 1. Individuals with moderate to severe CKD<br>2. Individuals with DM<br>3. 10-year risk of CAD > 20% | Very high risk: 80 mg/dL<br>High risk: 100 mg/dL                                                                             |
| <b>Central Asia, Middle East and North Africa</b>      |    |                                                                                                                                                           |                                                                                                      |                                                                                                                              |
| Ministry of Public Health Qatar (2020) [8]             | NA | NA                                                                                                                                                        | NA                                                                                                   | Patients on high-intensity statin therapy: 70 mg/dL<br>Patients on moderate-intensity statin therapy: 100 mg/dL              |
| <b>Central and Eastern Europe</b>                      |    |                                                                                                                                                           |                                                                                                      |                                                                                                                              |
| Polish Lipid Association (2021) [9]                    |    | 1. Pol-SCORE risk > 20%;<br>2. Serious ACS event *;<br>3. Status post-ACS and FH;<br>4. Status post-ACS in a patient with DM with additional risk factors | 1. Pol-SCORE risk $\geq$ 10% and $\leq$ 20% in primary prevention;<br>2. Documented CVD              | Extreme risk: 40 mg/dL<br>Pol-SCORE risk $\geq$ 5% and < 10% Very high risk: 55 mg/dL<br>High risk: 70 mg/dL                 |
| <b>High-income Western countries</b>                   |    |                                                                                                                                                           |                                                                                                      |                                                                                                                              |
| AHA/ACC (2018) [10]                                    | NA | Patients with clinical ASCVD who have a history of multiple major ASCVD events or 1 major ASCVD event and multiple high risk conditions                   | 10-year risk of ASCVD > 20%                                                                          | Very high-risk: 70 mg/dL                                                                                                     |
| ACC Consensus (2022) [11]                              | NA | Patients with clinical ASCVD who have a history of multiple major ASCVD events or 1 major ASCVD event and multiple high risk conditions                   | NA                                                                                                   | Very high risk: 55 mg/dL                                                                                                     |

|                                                                       |    |                                                                                             |                            |                                                                                                                                                                                                           |                                    |                                                                                                                                                                                                                   |                                                                                                                                        |
|-----------------------------------------------------------------------|----|---------------------------------------------------------------------------------------------|----------------------------|-----------------------------------------------------------------------------------------------------------------------------------------------------------------------------------------------------------|------------------------------------|-------------------------------------------------------------------------------------------------------------------------------------------------------------------------------------------------------------------|----------------------------------------------------------------------------------------------------------------------------------------|
| AACE/ACE (2017) [12]                                                  | 1. | Progressive ASCVD including unstable angina in patients after achieving an LDL-C < 70 mg/dL | 1.                         | Established or recent hospitalization for ACS, coronary, carotid or peripheral vascular disease, 10-year risk > 20%                                                                                       | 1.                                 | ≥2 risk factors and 10-year risk 10–20%                                                                                                                                                                           | Extreme risk: 55 mg/dL<br>Very high risk: 70 mg/dL<br>High risk: 100 mg/dL                                                             |
|                                                                       | 2. | Established clinical CVD in patients with DM, CKD 3/4, or HeFH                              | 2.                         | DM or CKD 3/4 with 1 or more risk factor(s)                                                                                                                                                               | 2.                                 | DM or CKD stage 3/4 with no other risk factors                                                                                                                                                                    |                                                                                                                                        |
|                                                                       | 3. | History of premature ASCVD                                                                  | 3.                         | HeFH                                                                                                                                                                                                      |                                    |                                                                                                                                                                                                                   |                                                                                                                                        |
|                                                                       |    |                                                                                             |                            |                                                                                                                                                                                                           |                                    |                                                                                                                                                                                                                   |                                                                                                                                        |
| Canadian Cardiovascular Society (2021) [13]                           | NA | NA                                                                                          |                            |                                                                                                                                                                                                           | Framingham risk score ≥ 20%        | Secondary prevention                                                                                                                                                                                              | ASCVD patients: 70 mg/dL                                                                                                               |
| National Vascular Disease Prevention Alliance (Australia) (2012) [14] | NA | NA                                                                                          |                            |                                                                                                                                                                                                           | 5-year risk of CVD > 15%           | Do not recommend establishing target values                                                                                                                                                                       | lipid-lowering                                                                                                                         |
| New Zealand Ministry of Health (2018) [15]                            | NA | NA                                                                                          |                            |                                                                                                                                                                                                           | 5-year risk of CVD ≥ 15%           | Individuals with a five-year CVD risk ≥ 15%: 70 mg/dL                                                                                                                                                             |                                                                                                                                        |
| National Institute for Health and Care Excellence (2014) [16]         | NA | NA                                                                                          |                            |                                                                                                                                                                                                           | 10-year risk of CVD ≥ 20%          | Do not recommend establishing target values                                                                                                                                                                       | lipid-lowering                                                                                                                         |
| ESC/EAS (2019) [17]                                                   | NA |                                                                                             | 1.<br>2.<br>3.<br>4.<br>5. | ASCVD patients<br>SCORE ≥ 10%<br>FH with ASCVD or with another major risk factor<br>Severe CKD<br>DM and target organ damage: ≥ 3 major risk factors; or early onset of T1DM of long duration (>20 years) | 1.<br>2.<br>3.<br>4.<br>5.         | SCORE ≥ 5% and <10%<br>Markedly elevated single risk factors<br>FH without other major risk factors<br>Moderate CKD<br>DM without target organ damage, with DM duration ≥10 years or other additional risk factor | Patients with ASCVD who experience a second vascular event within 2 years: 40 mg/dL<br>Very high risk: 55 mg/dL<br>High risk: 70 mg/dL |
| Sub-Saharan Africa                                                    |    |                                                                                             |                            |                                                                                                                                                                                                           |                                    |                                                                                                                                                                                                                   |                                                                                                                                        |
| South African Heart Association (2018) [18]                           | NA |                                                                                             |                            | Framingham CVD risk > 30%                                                                                                                                                                                 | Framingham CVD risk > 15% and ≤30% | Very high risk: 70 mg/dL<br>High risk: 97mg/dL                                                                                                                                                                    |                                                                                                                                        |

Abbreviations: AACE, American Association of Clinical Endocrinologists; ACC, American College of Cardiology; ACE, American College of Endocrinology; ACS, acute coronary syndrome; AHA, American Heart Association; ASCVD, atherosclerotic cardiovascular disease; CAD, coronary artery disease; CKD, chronic kidney disease; CVD, cardiovascular disease; DM, diabetes mellitus; ESC, European Society of Cardiology; EAS, European Atherosclerosis Society; FH, familial hypercholesterolemia; HeFH, heterozygous familial hypercholesterolemia; HoFH, homozygous familial hypercholesterolemia; LDL-C, low-density lipoprotein cholesterol; MI, myocardial infarction; NA, not available; Pol-SCORE, SCORE tables calibrated for the Polish population; SCORE, Systematic Coronary Risk Estimation; T1DM, type 1 diabetes mellitus; TC, total cholesterol. \* Serious ACS events: status post-ACS with another vascular incident within the past 2 years; status post-ACS and multi-level atherosclerosis; status post-ACS and multivessel coronary artery disease. Super-regions, regions were defined according to NCD-RisC report [19].

## Reference

1. Joint Committee for Guideline, Revision. 2016 Chinese guidelines for the management of dyslipidemia in adults. *J. Geriatr. Cardiol.* **2018**, *15*, 1–29. <https://doi.org/10.11909/j.issn.1671-5411.2018.01.011>.

2. Gonzalez-Santos, L.E.; Oliva, R.; Jimeno, C.; Gonzales, E.; Margarita Balabagno, M.; Ona, D.; Cinco, J.E.; Baston, A.; Caole-Ang, I.; Fojas, M.; et al. Executive Summary of the 2020 Clinical Practice Guidelines for the Management of Dyslipidemia in the Philippines. *J. ASEAN Fed. Endocr. Soc.* **2021**, *36*, 5–11. <https://doi.org/10.15605/jafes.036.01.01>.
3. Malaysia Ministry of Health. Management of Dyslipidaemia 2017 5th Edition. Available online: <http://www.acadmed.org.my/index.cfm?&menuid=67> (accessed on 1 July 2022).
4. Iyengar, S.S.; Puri, R.; Narasingan, S.N.; Wangnoo, S.K.; Mohan, V.; Mohan, J.C.; Misra, A.; Sriram, U.; Dalal, J.J.; Gupta, R.; et al. Lipid Association of India Expert Consensus Statement on Management of Dyslipidemia in Indians 2016: Part 1. *J. Assoc. Physicians India* **2016**, *64*, 7–52.
5. Kinoshita, M.; Yokote, K.; Arai, H.; Iida, M.; Ishigaki, Y.; Ishibashi, S.; Umemoto, S.; Egusa, G.; Ohmura, H.; Okamura, T.; et al. Japan Atherosclerosis Society (JAS) Guidelines for Prevention of Atherosclerotic Cardiovascular Diseases 2017. *J. Atheroscler. Thromb.* **2018**, *25*, 846–984. <https://doi.org/10.5551/jat.GL2017>.
6. Rhee, E.J.; Kim, H.C.; Kim, J.H.; Lee, E.Y.; Kim, B.J.; Kim, E.M.; Song, Y.; Lim, J.H.; Kim, H.J.; Choi, S.; et al. 2018 Guidelines for the Management of Dyslipidemia in Korea. *J. Lipid Atheroscler.* **2019**, *8*, 78–131. <https://doi.org/10.12997/jla.2019.8.2.78>.
7. Singapore Ministry of Health. MOH Clinical Practice Guidelines on Lipids. Available online: [https://www.moh.gov.sg/hpp/doctors/guidelines/GuidelineDetails/cpgmed\\_lipids](https://www.moh.gov.sg/hpp/doctors/guidelines/GuidelineDetails/cpgmed_lipids) (accessed on 1 July 2022).
8. Ministry of Public Health Qatar. National Clinical Guideline: The Assessment and Management of Dyslipidaemia. Available online: <https://www.moph.gov.qa/english/OurServices/eservices/Pages/Clinical-Guidelines.aspx> (accessed on 1 July 2022).
9. Banach, M.; Burchardt, P.; Chlebus, K.; Dobrowolski, P.; Dudek, D.; Dyrbus, K.; Gasior, M.; Jankowski, P.; Jozwiak, J.; Klosiewicz-Latoszek, L.; et al. PoLA/CFPiP/PCS/PSLD/PSD/PSH guidelines on diagnosis and therapy of lipid disorders in Poland 2021. *Arch. Med. Sci.* **2021**, *17*, 1447–1547. <https://doi.org/10.5114/aoms/141941>.
10. Grundy, S.M.; Stone, N.J.; Bailey, A.L.; Beam, C.; Birtcher, K.K.; Blumenthal, R.S.; Braun, L.T.; de Ferranti, S.; Faiella-Tommasino, J.; Forman, D.E.; et al. 2018 AHA/ACC/AACVPR/AAPA/ABC/ACPM/ADA/AGS/APhA/ASPC/NLA/PCNA Guideline on the Management of Blood Cholesterol: A Report of the American College of Cardiology/American Heart Association Task Force on Clinical Practice Guidelines. *J. Am. Coll. Cardiol.* **2019**, *73*, e285–e350. <https://doi.org/10.1016/j.jacc.2018.11.003>.
11. Writing Committee; Lloyd-Jones, D.M.; Morris, P.B.; Ballantyne, C.M.; Birtcher, K.K.; Covington, A.M.; DePalma, S.M.; Minissian, M.B.; Orringer, C.E.; Smith, S.C., Jr.; et al. 2022 ACC Expert Consensus Decision Pathway on the Role of Nonstatin Therapies for LDL-Cholesterol Lowering in the Management of Atherosclerotic Cardiovascular Disease Risk: A Report of the American College of Cardiology Solution Set Oversight Committee. *J. Am. Coll. Cardiol.* **2022**, *80*, 1366–1418. <https://doi.org/10.1016/j.jacc.2022.07.006>.
12. Jellinger, P.S.; Handelsman, Y.; Rosenblit, P.D.; Bloomgarden, Z.T.; Fonseca, V.A.; Garber, A.J.; Grunberger, G.; Guerin, C.K.; Bell, D.S.H.; Mechanick, J.I.; et al. American Association of Clinical Endocrinologists and American College of Endocrinology Guidelines for Management of Dyslipidemia and Prevention of Cardiovascular Disease-Executive Summary-complete Appendix to Guidelines. *Endocr. Pract.* **2017**, *23*, 479–497. <https://doi.org/10.4158/EP171764.GL>.
13. Pearson, G.J.; Thanassoulis, G.; Anderson, T.J.; Barry, A.R.; Couture, P.; Dayan, N.; Francis, G.A.; Genest, J.; Gregoire, J.; Grover, S.A.; et al. 2021 Canadian Cardiovascular Society Guidelines for the Management of Dyslipidemia for the Prevention of Cardiovascular Disease in Adults. *Can. J. Cardiol.* **2021**, *37*, 1129–1150. <https://doi.org/10.1016/j.cjca.2021.03.016>.
14. National Vascular Disease Prevention Alliance. Guidelines for primary cardiovascular disease prevention. Available online: <https://www.heartfoundation.org.au/Conditions/Fp-Lipid-management> (accessed on 1 July 2022).
15. Ministry of Health New Zealand. Cardiovascular Disease Risk Assessment and Management for Primary Care. Available online: [https://www.health.govt.nz/system/files/documents/publications/cardiovascular-disease-risk-assessment-management-primary-care-feb18-v4\\_0.pdf](https://www.health.govt.nz/system/files/documents/publications/cardiovascular-disease-risk-assessment-management-primary-care-feb18-v4_0.pdf) (accessed on 1 July 2022).
16. National Institute for Health and Care Excellence. Cardiovascular disease: Risk assessment and reduction, including lipid modification. Available online: <https://www.nice.org.uk/guidance/cg181> (accessed on 1 July 2022).
17. Mach, F.; Baigent, C.; Catapano, A.L.; Koskinas, K.C.; Casula, M.; Badimon, L.; Chapman, M.J.; De Backer, G.G.; Delgado, V.; Ference, B.A.; et al. 2019 ESC/EAS Guidelines for the management of dyslipidaemias: Lipid modification to reduce cardiovascular risk. *Eur. Heart J.* **2020**, *41*, 111–188. <https://doi.org/10.1093/eurheartj/ehz455>.
18. Klug, E.; Raal, F.J.; Marais, A.D.; Smuts, C.M.; Schamroth, C.; Jankelow, D.; Blom, D.J.; Webb, D.A. South African dyslipidaemia guideline consensus statement: 2018 update A joint statement from the South African Heart Association (SA Heart) and the Lipid and Atherosclerosis Society of Southern Africa (LASSA). *S. Afr. Med. J.* **2018**, *108*, 973–1000.
19. N.C.D. Risk Factor Collaboration. Repositioning of the global epicentre of non-optimal cholesterol. *Nature* **2020**, *582*, 73–77. <https://doi.org/10.1038/s41586-020-2338-1>.
